# Supplementary material for: How Intractability Spans the Cognitive and Evolutionary Levels of Explanation
Source: PubMed Central journal article supplement (PMC7687229; doi:10.1111/tops.12506), 2020-06-04
Supplement: TOPS-12-1382-s002.pdf [file TOPS-12-1382-s002.pdf]

An intractable  $F$  implies  
an intractable  $F'$  (unless  
 $P = NP$ ), because...

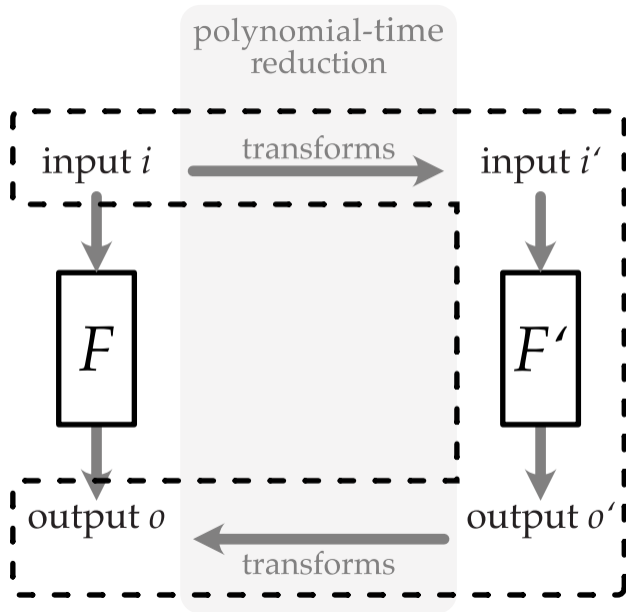

...otherwise  $F$  could be  
computed tractably (via  
dashed computations).
